# Supplementary material for: Characterizing the pocketome of Mycobacterium tuberculosis and application in rationalizing polypharmacological target selection
Source: PubMed Central journal article supplement — Sci Rep. 2014 Sep 15;4:6356. doi: 10.1038/srep06356 (PMC5376175; doi:10.1038/srep06356), 2014-09-15
Supplement: srep06356-s1.pdf [file srep06356-s1.pdf]

# Characterizing the pocketome of *Mycobacterium tuberculosis* and application in rationalizing polypharmacological target selection

*Praveen Anand and Nagasuma Chandra\**

*Department of Biochemistry, Indian Institute of Science,*

*Bangalore-560012, India.*

## KEYWORDS

Polypharmacology, Binding site similarity network, Pocketome, Drug-target network, Drug repurposing.

## Correspondence to:

Prof. Nagasuma Chandra  
Department of Biochemistry  
Indian Institute of Science  
Bangalore, India, 560012  
[Tel:+91-80-22932892](tel:+91-80-22932892)  
**Email:** [nchandra@biochem.iisc.ernet.in](mailto:nchandra@biochem.iisc.ernet.in)

## Supplementary Information

Figure S1

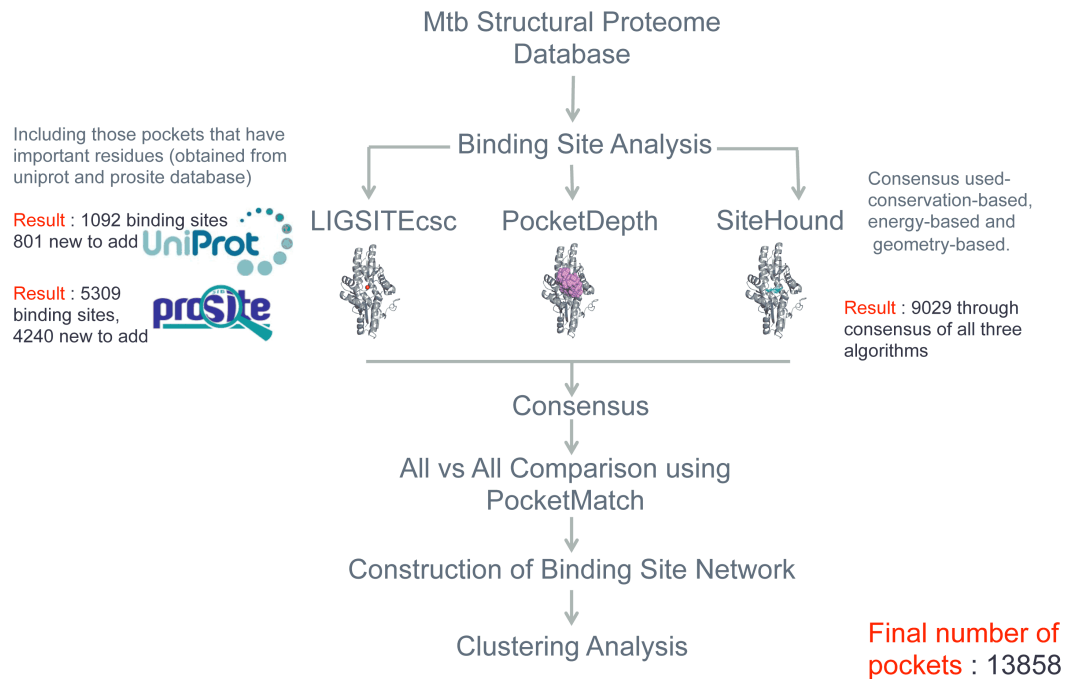

**Figure S1. A workflow for *Mtb*-pocketome analysis.** This workflow depicts the different steps involved in obtaining the pockets from protein structures using consensus predictions from three different algorithms for binding site prediction. All the PocketDepth<sup>21</sup> pockets within 5Å radius of predicted LIGSITEcsc<sup>33</sup> pockets were selected. For all pockets thus identified, SiteHound<sup>34</sup>, an energy method that scans favorable interaction zones for a methyl probe within the protein was also used as a filter to extract out a set of consensus ligand binding sites.

**Table S1**

| Cut-off                   | Analysis                                                                                                                                                          | Justification                                                                                                                                                                | Remarks                                                                                                                                                   |
|---------------------------|-------------------------------------------------------------------------------------------------------------------------------------------------------------------|------------------------------------------------------------------------------------------------------------------------------------------------------------------------------|-----------------------------------------------------------------------------------------------------------------------------------------------------------|
| PMAX $\geq$ 0.6           | (Figure 1, Figure2)Ligand Associations, Clustering coefficient score for PPI index                                                                                | Significant similarities observed at this cut-off and implies binding of similar ligands                                                                                     | Default cut-off used in this study                                                                                                                        |
| PMAX $\geq$ 0.6 $\pm$ 0.1 | (Figure 6) Drug bank compound association to sets, atleast one site within the cluster should have PMAX $\geq$ 0.6 and the rest of the sites with PMAX $\geq$ 0.5 | A drugbank compound should have significant similarity (PMAX $\geq$ 0.6) to atleast one of the pockets in the set and part similarity (PMAX $\geq$ 0.5) to rest of the sites | Chosen compound is ensured to have bindings site similairty with all the sites within the sets                                                            |
| PMAX $\geq$ 0.7           | Figure 3A and Figure 3B, Binding site similarity network and clustering of Mtb pocketome and MOAD dataset                                                         | The stringency of similarity is increased to pick up highly similar sites for polypharmacology                                                                               | More confident similarities were sought (at the cost of missing some). Hence a higher cut-off. This implies that all the sites are significantly similar. |
| PMAX $\geq$ 0.6           | Figure S4, Approved drug association                                                                                                                              | The stringency of similarity is increased to pick up highly similar sites for polypharmacology                                                                               | More confident associations were sought                                                                                                                   |
| PMAX $\geq$ 0.4           | Comparison to other studies and current literature                                                                                                                | 0.4 is the minimum required value to indicate significant hit for a pocket                                                                                                   | The definition/boundary of binding site is not fixed, so the cut-off was lowered to overcome the sensitivity to variations in binding site definitions    |

**Different cut-off used in this study.** Various PocketMatch cut-offs that have been used in this study along with the justification and description has been mentioned here for each of the analysis carried out.

**Table S2**

| Network Type | Network                                                                                                            | Corresponding Figure in manuscript | Nodes                                                                                                                                       | Edges                                                                                                                                                                                                                                                        | Purpose                                                                                                                             |
|--------------|--------------------------------------------------------------------------------------------------------------------|------------------------------------|---------------------------------------------------------------------------------------------------------------------------------------------|--------------------------------------------------------------------------------------------------------------------------------------------------------------------------------------------------------------------------------------------------------------|-------------------------------------------------------------------------------------------------------------------------------------|
| 1            | Binding-Site similarity network of Mtb Pocketome at P <sub>MAX</sub> ≥ 0.7.                                        | Figure 5A                          | Predicted binding sites from Mtb Pocketome                                                                                                  | Similarity between binding sites detected using PocketMatch algorithm with a cutoff P <sub>MAX</sub> ≥ 0.7.                                                                                                                                                  | To obtain sets of similar binding sites in form of clusters using MCODE algorithm.                                                  |
| 2            | Binding-Site similarity network of known binding sites from PDB obtained from MOAD database                        | Figure 5B                          | Binding sites extracted from MOAD dataset of known Protein-ligand complexes from PDB                                                        | Similarity between binding sites using PocketMatch algorithm with same cut-off as above used for predicted sites                                                                                                                                             | This network was constructed to validate the clusters obtained using MCODE algorithm.                                               |
| 3            | Sub-network of Figure 5A, each binding site set showing binding site similarities to 'known drug-binding sites DB' | Figure 6                           | Two types of nodes in the network.<br>Circular nodes – Binding sites of the corresponding sets<br>Triangular nodes – Binding sites of drugs | Two kinds of edges.<br>Plain edges – Binding site similarity between the pockets in the pocketome (b/w circular nodes)<br>Dashed edges – Binding site similarity between the predicted site and the drug binding sites . (b/w circular and triangular nodes) | To visualize the similarity relationship between the binding site sets and the known drug binding sites.                            |
| 4            | Bipartite network of target proteins in Mtb and its association with approved drugs.                               | Figure S4                          | Two types of nodes<br>Blue nodes– Approved drugs.<br>Red nodes– Targets in Mtb proteome                                                     | Edges here represent the similarity between a binding site of the corresponding protein from the Mtb Pocketome and the binding site of approved drug. This is calculated using PocketMatch and the cut-off used for similarity is same as above.             | This network was constructed to rank-list the targets with polypharmacological profile and the drugs with potential of repurposing. |

**Different network variants constructed in this study.** The reference to the corresponding figures in the manuscript is also mentioned with the detailed description of the node and the edges in each of them. The purpose on such a network construction is also mentioned briefly.

**Table S3**

| Experiment/Method                                                                                                                                                                    | Tools/Dataset                                                                                                                            | Reference No.                                                                                                                          |
|--------------------------------------------------------------------------------------------------------------------------------------------------------------------------------------|------------------------------------------------------------------------------------------------------------------------------------------|----------------------------------------------------------------------------------------------------------------------------------------|
| 1. Obtaining Structural Proteome                                                                                                                                                     | <ul style="list-style-type: none"> <li>Mtb Structural Proteome</li> <li>Protein Data Bank</li> <li>MODBASE</li> </ul>                    | 27                                                                                                                                     |
| 2. Deriving consensus binding site                                                                                                                                                   | <ul style="list-style-type: none"> <li>PocketDepth</li> <li>LigsiteCSC</li> <li>SiteHound</li> <li>Prosite</li> <li>Uniprot</li> </ul>   | 22, 34, 35, 36, 37 and 38                                                                                                              |
| 3. Construction of Binding site similarity network                                                                                                                                   | <ul style="list-style-type: none"> <li>PocketMatch</li> <li>Cytoscape</li> </ul>                                                         | 23, 40                                                                                                                                 |
| 4. Deriving drug binding sites                                                                                                                                                       | <ul style="list-style-type: none"> <li>Drugbank</li> <li>Drugport</li> <li>TBDrugome</li> </ul>                                          | 44,<br><a href="http://www.ebi.ac.uk/thornton-srv/databases/drugport/">http://www.ebi.ac.uk/thornton-srv/databases/drugport/</a><br>61 |
| 5. Validation (Predicting pocket, Ligand association, Clustering, drug association)                                                                                                  | <ul style="list-style-type: none"> <li>Procognate</li> <li>KEGG</li> <li>TM-Align</li> <li>Autodock Vina</li> <li>BindingMOAD</li> </ul> | 47, 51, 42, 50, 48                                                                                                                     |
| 6. Extracting sets/groups of similar binding sites from binding Site similarity network (nodes as binding sites and edges with similarity relationship PMAX >= 0.7)                  | <ul style="list-style-type: none"> <li>MCODE</li> </ul>                                                                                  | 39                                                                                                                                     |
| 7. Construction of binding-site similarity network at PMAX ≥0.6 and obtaining CC for each node in the network                                                                        | <ul style="list-style-type: none"> <li>igraph package in R</li> </ul>                                                                    | 41                                                                                                                                     |
| 7. Clustering of bipartite network (with two types of nodes predicted Mtb pockets of target proteins and approved drug binding sites, edges being the binding site similarity >=0.7) | <ul style="list-style-type: none"> <li>TNET</li> </ul>                                                                                   | 60                                                                                                                                     |

**Datasets and tools used in the study.** Various datasets and tools used in this study has been explained with the brief description of the experiment/method and the corresponding reference number in the manuscript.

**Table S4**

| PM Score Cut-off | No. of Hits for PMIN | No. of Hits for PMAX |
|------------------|----------------------|----------------------|
| ≥0.4             | 13547                | 13297                |
| ≥0.5             | 11601                | 11029                |
| ≥0.6             | 7612                 | 6906                 |
| ≥0.7             | 2385                 | 1644                 |
| ≥0.8             | 114                  | 14                   |
| ≥0.9             | 15                   | 0                    |
| 1                | 7                    | 0                    |

**PDB ligand hit frequency against *Mtb* Pocketome.** This table describes the number of hits found for Mtb Pocketome when compared to known binding sites present in PDB at different PMIN and PMAX cut-off scores reported by PM.

## Supplementary Text 1

Mtb pockets obtained were first clustered at 0.6 P<sub>MAX</sub>. The binding site network obtained with this cut-off was then subjected to MCODE algorithm that resulted in 105 clusters. Around 7379 binding sites (nodes) were present in this network. Remaining (13858 - 7369) sites were unique singletons. These singletons could be considered as individual site types each. So the total number of site types now add upto = 105 + (13858 - 7369) = 6584 types.

The stringency of P<sub>MAX</sub> was increased to 0.7 and binding site similarity network now obtained, consisted of 698 nodes (binding sites) and MCODE algorithm clustered them into 29 sets. These could be considered further for polypharmacological applications.

Figure S2

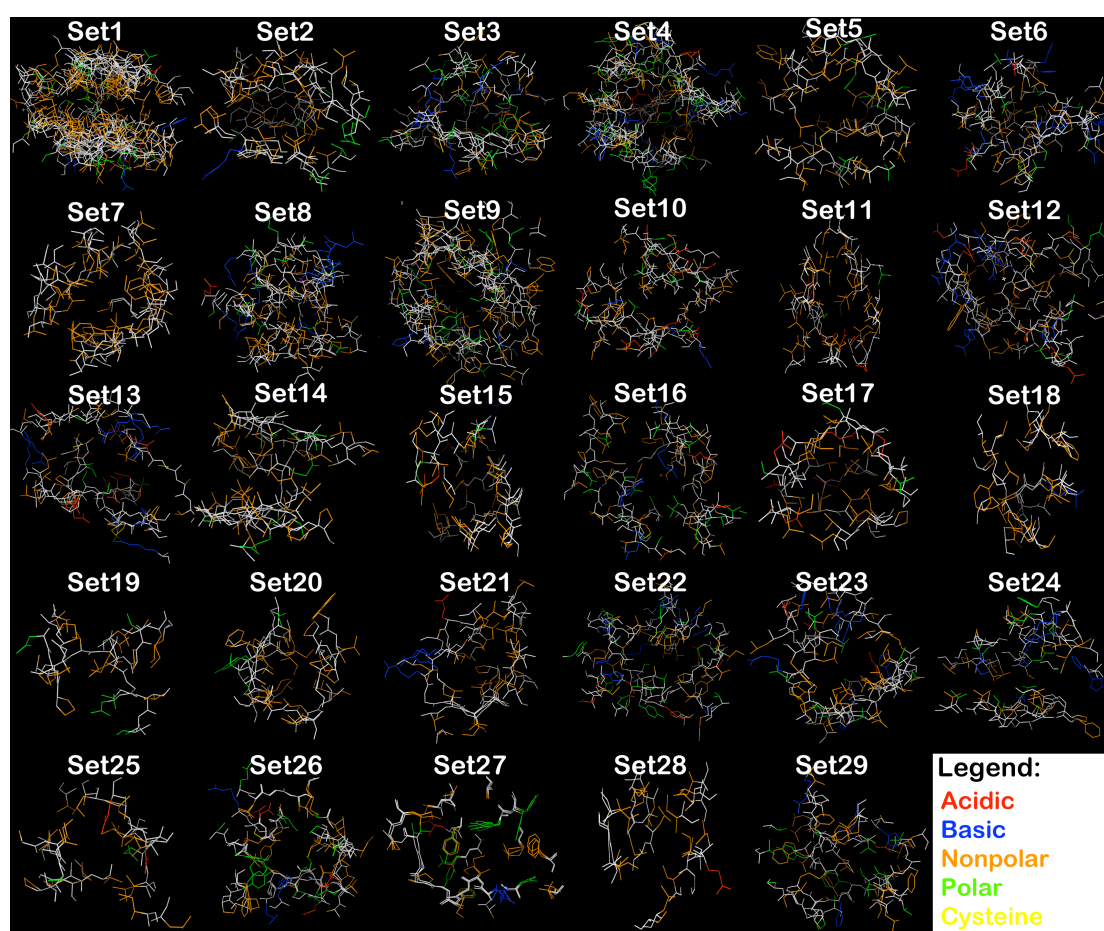

**Figure S2. Superpositions of binding site sets.** This figure depicts the superposition of similar sites present within a set. The residues are colored according to their chemical properties (provided as legend – right bottom corner). The backbone trace atoms are colored in white. Site superpositions were obtained using PocketAlign. The site having highest degree within the set was considered as the reference and all other sites were superposed onto it.

**Table S5**

| Protein | Pocket       | No. of Cofactor hits | No. of Drug hits | Clustering Coefficient (PMAX $\geq$ 0.6) | PPI Index | Description                                                       | TDR Druggability Index | Normalized Degree |
|---------|--------------|----------------------|------------------|------------------------------------------|-----------|-------------------------------------------------------------------|------------------------|-------------------|
| Rv0980c | Rv0980c.1_r1 | 160                  | 215              | 1                                        | 0.65      | PE-PGRS family protein PE_PGRS18                                  | 0.3                    | 0.00763359        |
| Rv0242c | Rv0242c.1_r1 | 112                  | 266              | 0.64                                     | 0.51      | 3-ketoacyl-acyl carrier protein reductase                         | 0.4                    | <b>0.633588</b>   |
| Rv0080  | Rv0080_r1    | 0                    | 224              | 0.75                                     | 0.5       | Conserved Hypothetical protein                                    | Present in TDR         | 0.0553435         |
| Rv0917  | Rv0917_r1    | 542                  | 324              | 0.52                                     | 0.5       | Possible glycine betaine transport integral membrane protein BetP | NA                     | 0.0324427         |
| Rv2223c | Rv2223c_r1   | 118                  | 239              | 0.65                                     | 0.47      | Probable exported protease                                        | NA                     | <b>0.370229</b>   |
| Rv2688c | Rv2688c_r1   | 146                  | 153              | 1                                        | 0.46      | Antibiotic-transport ATP-binding protein ABC transporter          | 0.4                    | 0.00763359        |
| Rv0744c | Rv0744c_r1   | 34                   | 352              | 0.4                                      | 0.42      | Possible transcriptional regulatory protein                       | Present in TDR         | 0.0534351         |
| Rv2321c | Rv2321c_r1   | 3                    | 223              | 0.63                                     | 0.42      | Probable ornithine aminotransferase (C-terminus part) RocD2       | 0.1                    | 0.0324427         |
| Rv1059  | Rv1059_r1    | 263                  | 244              | 0.57                                     | 0.41      | Conserved Hypothetical protein                                    | NA                     | <b>0.496183</b>   |
| Rv1359  | Rv1359_r7    | 14                   | 141              | 0.97                                     | 0.41      | Probable transcriptional regulatory protein                       | NA                     | 0.0648855         |
| Rv0242c | Rv0242c_r1   | 312                  | 213              | 0.64                                     | 0.41      | 3-ketoacyl-acyl carrier protein reductase                         | 0.4                    | <b>0.641221</b>   |
| Rv3825c | Rv3825c_r1   | 430                  | 251              | 0.54                                     | 0.41      | Polyketide synthase Pks2                                          | 0.7                    | <b>0.503817</b>   |
| Rv2836c | Rv2836c.2_r2 | 49                   | 190              | 0.7                                      | 0.4       | Possible DNA-damage-inducible protein F                           | 0.1                    | <b>0.301527</b>   |
| Rv0931c | Rv0931c_r2   | 0                    | 139              | 0.95                                     | 0.4       | Transmembrane serine/threonine-protein kinase D PknD              | 0.7                    | 0.028626          |
| Rv1902c | Rv1902c_r1   | 159                  | 213              | 0.6                                      | 0.38      | Probable sialic acid-transport integral membrane protein NanT     | 0.1                    | <b>0.53626</b>    |
| Rv1475c | Rv1475c_r4   | 13                   | 182              | 0.69                                     | 0.38      | Probable iron-regulated aconitate hydratase Acn                   | 0.2                    | 0.0209924         |
| Rv1266c | Rv1266c_r1   | 6                    | 171              | 0.73                                     | 0.38      | Probable transmembrane serine/threonine-protein kinase H PknH     | 0.7                    | 0.0687023         |
| Rv2766c | Rv2766c_r1   | 0                    | 213              | 0.58                                     | 0.37      | Probable short-chain type dehydrogenase/reductase                 | 0.5                    | <b>0.704198</b>   |
| Rv3085  | Rv3085_r1    | 413                  | 285              | 0.44                                     | 0.37      | Probable short-chain type dehydrogenase/reductase                 | 0.4                    | 0.0763359         |

**Additional PP targets found from Pocketome.** This list of top 20 high scoring pockets along with the information on number of cofactor hits, number of drug hits, clustering coefficient, and TDR druggability score for each of them. Normalized degree is also reported for each node and the high degree values have been highlighted in bold.

**Table S6**

| Pocket          | Isoniazid Adduct Binding Site | PMAX Score |
|-----------------|-------------------------------|------------|
| 2763c_1df7_A_r2 | 2nq8_ZID:B:450                | 0.661247   |
| 1059_r10        | 2idz_ZID:A:300                | 0.649248   |
| 0753c_r18       | 2ieb_ZID:A:300                | 0.601528   |
| 2858c_r1        | 2nq8_ZID:A:550                | 0.591792   |
| 1484_r1         | 2ie0_ZID:A:300                | 0.580556   |
| 2623_r1         | 2ie0_ZID:A:300                | 0.56821    |
| 1996_r1         | 1zid_ZID:A:300                | 0.542005   |
| 0155_r2         | 2idz_ZID:A:300                | 0.538327   |
| 2971_r8         | 2nq8_ZID:A:550                | 0.531915   |
| 2671.1_r3       | 2nq8_ZID:A:550                | 0.508963   |

**Isoniazid Secondary Hits.** These are the isoniazid secondary target hits picked up with high PMAX score. The first column represents the Mtb protein (Rv No.) separated by ‘\_’ and pocket identifier, whereas the second column represents the isoniazid adduct binding site obtained from PDB.





**Table S7**

| Protein        | Pocket             | Drug binding site | Tuberculist Pathway       | PMIN     | PMAX     |
|----------------|--------------------|-------------------|---------------------------|----------|----------|
| Rv0013         | Rv0013_r2          | 1pbc_BHA:A:396    | Folate_biosynthesis       | 0.567677 | 0.519889 |
| Rv2964         | Rv2964_r17         | 1pbc_BHA:A:396    | One_carbon_pool_by_folate | 0.489429 | 0.467677 |
| Rv1207         | Rv1207_r9          | 1pbc_BHA:A:396    | Folate_biosynthesis       | 0.484144 | 0.462626 |
| Rv2124c        | Rv2124c_r1         | 1pbc_BHA:A:396    | One_carbon_pool_by_folate | 0.503876 | 0.459596 |
| Rv0812         | Rv0812_r27         | 1pbf_BHA:A:396    | Folate_biosynthesis       | 0.542857 | 0.459459 |
| Rv1093         | Rv1093_r21         | 1pbf_BHA:A:396    | One_carbon_pool_by_folate | 0.496444 | 0.447436 |
| Rv3608c_1eye_A | Rv3608c_1eye_A_r2  | 1pbc_BHA:A:396    | Folate_biosynthesis       | 0.482835 | 0.440404 |
| Rv3608c_1eye_A | Rv3608c_1eye_A_r2  | 1pbf_BHA:A:396    | Folate_biosynthesis       | 0.564723 | 0.439646 |
| Rv1005c        | Rv1005c_r20        | 1pbc_BHA:A:396    | Folate_biosynthesis       | 0.448485 | 0.428986 |
| Rv2763c        | Rv2763c_r2         | 1pbf_BHA:A:396    | One_carbon_pool_by_folate | 0.534759 | 0.426743 |
| Rv2763c        | Rv2763c_r2         | 1pbf_BHA:A:396    | Folate_biosynthesis       | 0.534759 | 0.426743 |
| Rv2211c        | Rv2211c_r4         | 1pbc_BHA:A:396    | One_carbon_pool_by_folate | 0.486643 | 0.423232 |
| Rv0956         | Rv0956_r3          | 1pbf_BHA:A:396    | One_carbon_pool_by_folate | 0.558712 | 0.41963  |
| Rv3608c_1eye_A | Rv3608c_1eye_A_r15 | 1pbf_BHA:A:396    | Folate_biosynthesis       | 0.442943 | 0.41963  |
| Rv2211c        | Rv2211c_r3         | 1pbc_BHA:A:396    | One_carbon_pool_by_folate | 0.622222 | 0.414815 |
| Rv0957         | Rv0957_r7          | 1pbc_BHA:A:396    | One_carbon_pool_by_folate | 0.621212 | 0.414141 |
| Rv1093         | Rv1093_r31         | 1pbf_BHA:A:396    | One_carbon_pool_by_folate | 0.41394  | 0.41394  |
| Rv3608c_1eye_A | Rv3608c_1eye_A_r1  | 1pbf_BHA:A:396    | Folate_biosynthesis       | 0.45377  | 0.408974 |
| Rv2124c        | Rv2124c_r1         | 1pbf_BHA:A:396    | One_carbon_pool_by_folate | 0.522048 | 0.406423 |
| Rv0013         | Rv0013_r2          | 1pbf_BHA:A:396    | Folate_biosynthesis       | 0.624467 | 0.406105 |
| Rv1093         | Rv1093_r21         | 1pbc_BHA:A:396    | One_carbon_pool_by_folate | 0.515385 | 0.406061 |
| Rv1207         | Rv1207_r9          | 1pbf_BHA:A:396    | Folate_biosynthesis       | 0.543386 | 0.403805 |
| Rv2447c        | Rv2447c_r8         | 1pbc_BHA:A:396    | Folate_biosynthesis       | 0.537374 | 0.401207 |
| Rv2964         | Rv2964_r17         | 1pbf_BHA:A:396    | One_carbon_pool_by_folate | 0.539118 | 0.400634 |

**PAS secondary hits.** All the hits in the folate metabolism pathway (PMAX  $\geq$ 0.4) obtained for PAS (PDB HETATM code :BHA) binding site in the Mtb pocketome.

## Supplementary Text 2

Kinnings *et.al.* had proposed TB-drugome to understand the interactions of Mtb proteins with the currently approved drugs by constructing a drug-target network through similarities at the binding site. In their study, SMAP was used to obtain the similarity between predicted pockets in Mtb structural proteome and the drug-binding sites of the approved drugs. A systematic comparison was carried out at two levels – firstly the prediction of pockets, followed by the drug association obtained through binding site similarity.

The pockets were extracted from the ehits docking poses obtained from the TBdrugome studies. All the 1097 predicted pockets from the MODBASE models reported from TBdrugome studies were compared to pockets predicted from our approach. Overlap of atleast one residue was considered for the pockets detected by both the methods. Out of 1097 cases, 662 pockets detected had an overlap of atleast one residue, thus covering 60% of the pockets reported already. PocketMatch was also run to check all the drug associations reported by TBdrugome study and an average PMAX score of 0.40 was obtained. Data can be accessed at <http://proline.biochem.iisc.ernet.in/mtbpocketome/methods.phpunder> ‘Comparison to TB-Drugome’ section.

**Figure S4**

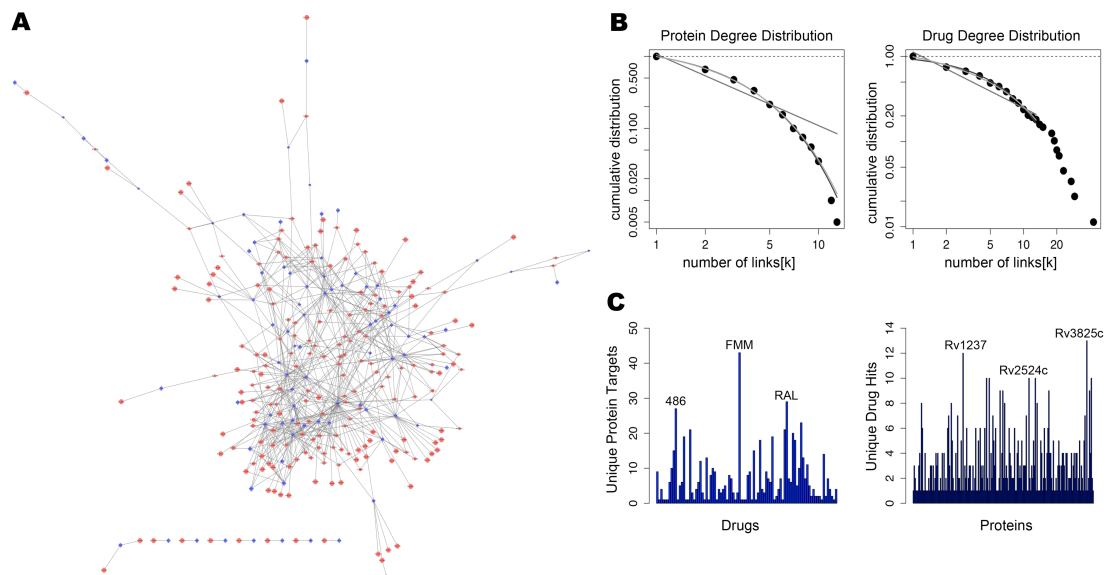

**Figure S4. Bipartite network of high confident drug target and approved drugs.** (A) Bipartite Network of high confident targets and approved drugs. The red nodes represent the high confidence targets obtained from targetTB and the blue nodes represent the approved drugs. The edge represents significant site similarity (Pvalue  $\sim 1e-04$ ). (B) Cumulative Degree distribution of proteins and the drug in the bipartite network. (C) Drugs and proteins with highest number of connections in the bipartite network.
